# Supplementary material for: L-Glutamine-Functionalized Magnetic Polystyrene for Highly Efficient Synthesis of 2- Amino-4H-Pyrans
Source: Research Square preprint supplement (doi:10.21203/rs.3.rs-8446242/v1), 2026-01-19
Supplement: Supplementary file 1 [file 50dd68b1ecad7d74702ef8cf.docx]

**Supporting information:**

**L-Glutamine-Functionalized Magnetic Polystyrene for Highly Efficient Synthesis of 2-Amino-4H-Pyrans**

Fatemeh Zahra Hajian 1, Sakineh Asghari1*, Ghasem Firouzzadeh Pasha1*, Taraneh Abbaspour1*, Mahmood Tajbakhsh1, Fatemeh Zare1

*1 Department of Organic Chemistry, Faculty of Chemistry, University of Mazandaran, Babolsar 47416-95447, Iran*

****Corresponding Authors:***

Sakineh Asghari *

Department of Organic Chemistry, Faculty of Chemistry, University of Mazandaran, Babolsar 47416-95447, Iran.

Email: [s.asghari@umz.ac.ir](mailto:s.asghari@umz.ac.ir); Tel: (+98) 1135302357; Fax: (+98)1135302350

**ORCID:** Sakineh Asghari:[https://orcid.org/ 0000-0002-6608-9525](https://orcid.org/0000-0002-4856-1937)

Ghasem Firouzzadeh Pasha *

Department of Organic Chemistry, Faculty of Chemistry, University of Mazandaran, Babolsar 47416-95447, Iran.

Email: [ghasemf.pasha@umail.umz.ac.ir](mailto:ghasemf.pasha@umail.umz.ac.ir), [ghasempasha@yahoo.com](mailto:ghasempasha@yahoo.com)

**ORCID:** Ghasem Firouzzadeh Pasha:[https://orcid.org/ 0000-0002-5054-2938](https://orcid.org/0000-0002-4856-1937)

**Table of Contents**

**1. Materials and Instrumentation**

**2. Experimental Section**

**2.1 Synthesis of nanomagnetic polystyrene functionalized with L-glutamine (L-Glu-MPS)**

- 1. **General experimental procedure for synthesis of 2‑amino‑4*H*‑pyrans:**

**1. Materials and Instrumentation**

Chloromethylated polystyrene resin cross-linked with 1% divinylbenzene (DVB) (chloride content of 1.8 mmol/g) (PS-Cl) was purchased from TCI Company. Other chemicals, such as ferric chloride hexahydrate (FeCl3·6H2O), ferrous chloride tetrahydrate (FeCl2·4H2O), ammonium hydroxide (NH3·H2O, 25 wt%), and L-glutamine, were obtained from Fluka and Merck and used without further purification. The structures of PS-Cl, MPS, and MPS-L-GLU were characterized using several analytical techniques: X-ray powder diffraction (Philips PW-1830), thermogravimetric analysis (Netzsch, Selb, Germany), Fourier-transform infrared (FT-IR) spectroscopy (Bruker Tensor 27, Germany), scanning electron microscopy (Tescan, Brno, Czech Republic), and inductively coupled plasma analysis (Varian 730-ES, Iran).

**2. Experimental Section**

**2.1 Synthesis of nanomagnetic polystyrene functionalized with L-glutamine (L-Glu-MPS)**

To magnetize the polystyrene substrate, a mixture of 1 g of chloromethylated polystyrene microspheres (PS-Cl), 1.5 g of FeCl₃·6H₂O, and 0.6 g of FeCl₂·4H₂O was prepared by suspending it in 12 ml of ethanol. Continuous sonication was performed at room temperature until the mixture became uniform. The mixture was heated under reflux for 1 hour, then 10 ml of 25% NH₃·H₂O was added and stirred for another hour. After cooling, the black precipitate was separated with an external magnet. Lastly, the solution was washed multiple times with deionized water and ethanol to ensure neutralization. The resulting magnetic polystyrene microspheres (MPS) were then dried in an oven at 60 °C, yielding a black powder [33].

To obtain L-Glu-MPS, a mixture of MPS (1 g) and L-glutamine (2.24 g, 20 mmol) in 50 mL toluene was refluxed for two days. After cooling to room temperature, L-Glu-MPS was separated with a strong magnet and washed repeatedly with DCM and EtOH. The resulting L-Glu-MPS was dried in an oven at 60 °C to produce final brown powder.

- 1. **General experimental procedure for synthesis of 2‑amino‑4*H*‑pyrans:**

A mixture of benzaldehyde derivatives (1 mmol), dimedone or ethyl acetoacetate (1 mmol), and malononitrile (1 mmol) in 10 mL of ethanol was stirred in the presence of 20 mg of L-Glu-MPS nanocatalyst for 20 minutes at room temperature. The reaction was monitored by thin-layer chromatography (TLC) using a ratio of 3:1 hexane to ethyl acetate.

After completion of the reaction, the catalyst was extracted from the mixture using a supermagnet and washed with ethanol. The solvent was then evaporated, and the resulting precipitate was purified through recrystallization in hot ethanol.

The product structures were verified through melting point analysis and characterized using 13C NMR, and 1H NMR spectroscopy, Spectra data for all compounds are presented in the supporting section in Figures S1–S113.

- - 1. **. 1H NMR, 13C NMR Spectrometry of compounds**

**Compound 5a: Ethyl 6-amino-5-cyano-2-methyl-4-(4-chlorophenyl)-4H-pyran-3-carboxylate**

Yellow powder, m.p: 175-177 oC. IR: (KBr): (νmax, cm-1) 3409 and 3333 (NH2), 3014 (CSP2 -H), 2979 (Csp3-H), 2188 (CN), 1681 (C=O), 1608 (C=C), 787 (C–Cl) cm -1.1H NMR (400.13 MHz, CDCl3) *δ* (ppm): 1.13 (t, *J* = 8 Hz, 3H, CH3), 2.39 (s, 3H, CH3), 4.03-4.09 (m, 2H, CH2), 4.45 (s, 1H, C-H), 4.56 (s, 2H, NH2), 7.16 (d, *J* = 8 Hz, 2H, Ar-H), 7.29 (d, *J* = 8 Hz, 2H, Ar-H). 13C NMR (100.62 MHz, CDCl3):δC (ppm): 13.35, 17.89, 37.68, 60.24, 60.40, 106.94, 113.16, 128.34, 128.62, 128.73, 141.79, 145.26, 161.97, 165.10.

**Compound 5b: Ethyl 6-amino-5-cyano-2-methyl-4-(3-nitrophenyl)-4H-pyran-3-carboxylate**

Orange powder, m.p: 173-175 oC. IR: (KBr): (νmax, cm-1) 3401 and 3330 (NH2), 3079 (CSP2 -H), 2987 (Csp3-H), 2191 (CN), 1690 (C=O), 1604 (C=C), 1530 (NO2 asym), 1377 (NO2 sym) cm -1. 1H NMR (400.13 MHz, CDCl3), *δ* (ppm): 1.14 (t, *J* = 8 Hz, 3H, CH3), 2.43 (s, 3H, CH3), 4.04-4.10 (m, 2H, CH2), 4.60 (s, 1H, C-H), 4.67 (s, 2H, NH2), 7.49-7.62 (m, 2H, Ar-H), 8.07-8.14 (m, 2H, Ar-H). 13C NMR (100.62 MHz, CDCl3):δC (ppm): 13.49, 18.06, 38.15, 60.40, 60.57, 106.13, 112.84, 121.98, 123.13, 128.95, 133.43, 145.50, 148.03, 157.25, 161.18, 164.31.

**Compound 5d: Ethyl 6-amino-5-cyano-2-methyl-4-(4-cyanophenyl)-4H-pyran-3-carboxylate**

Brown powder, m.p: 130-132 oC. IR: (KBr): (νmax, cm-1) 3401 and 3331 (NH2), 3064 (CSP2 -H), 2981 (Csp3-H), 2192 (CN), 1676 (C=O), 1602 (C=C) cm-1. 1H NMR (400.13 MHz, CDCl3) *δ* (ppm): 1.11 (t, *J* = 8 Hz, 3H, CH3), 2.42 (s, 3H, CH3), 4.02-4.09 (m, 2H, CH2), 4.52 (s, 1H, C-H), 4.64 (s, 2H, NH2), 7.35 (d, *J* = 8 Hz, 2H, Ar-H), 7.64 (d, *J* = 8 Hz, 2H, Ar-H). 13C NMR (100.62 MHz, CDCl3):δC (ppm): 13.95, 18.66, 38.99, 60.77, 61.01, 106.62, 111.06, 118.60, 118.79, 128.37, 132.60, 149.20, 157.85, 158.02, 165.38.

**Compound 5e: Ethyl 6-amino-5-cyano-2-methyl-4-(2,4-dichlorophenyl)-4H-pyran-3-carboxylate**

Light yellow powder, m.p: 132-134 oC. IR: (KBr): (νmax, cm-1) 3473 and 3324 (NH2), 3093 (CSP2 -H), 2985 (Csp3-H), 2203 (CN), 1681 (C=O), 1602 and 1562 (C=C), 771 and 677 (C–Cl) cm -1.1H NMR (400.13 MHz, CDCl3) *δ* (ppm): 1.10 (t, *J* = 8 Hz, 3H, CH3), 2.42 (s, 3H, CH3), 4.03 (q, *J*=8 Hz, 2H, CH2), 4.62 (s, 1H, C-H), 5.03 (s, 2H, NH2), 7.12 (d, *J* = 8 Hz, 1H, Ar-H), 7.22 (d, *J* = 8 Hz, 1H, Ar-H), 7.38 (s, 1H, Ar-H). 13C NMR (100.62 MHz, CDCl3):δC (ppm): 13.29, 17.74, 34.43, 59.80, 60.18, 105.85, 117.80, 127.02, 128.84, 130.04, 139.21, 157.12, 157.49, 161.36, 164.30, 164.72.

**Compound 5f: Ethyl 6-amino-5-cyano-2-methyl-4-(2-chlorophenyl)-4H-pyran-3-carboxylate**

Light yellow powder, m.p: 188- 192 oC. IR: (KBr): (νmax, cm-1) 3428 and 3334 (NH2), 3036 (CSP2 -H), 2979 (Csp3-H), 2195 (CN), 1688 (C=O), 1604 (C=C), 744 (C–Cl) cm -1.1H NMR (400.13 MHz, CDCl3) *δ* (ppm): 1.07 (t, *J* = 8 Hz, 3H, CH3), 2.42 (s, 3H, CH3), 3.98-4.04 (m, 2H, CH2), 4.52 (s, 1H, C-H), 5.08 (s, 2H, NH2), 7.18 (dd, *J* = 8 Hz, *J* = 8 Hz, 2H, Ar-H), 7.23 (dd, *J* = 8 Hz, *J* = 8 Hz, 1H, Ar-H), 7.35 (dd, *J* = 12 Hz, *J* = 4 Hz, 1H, Ar-H). 13C NMR (100.62 MHz, CDCl3):δC (ppm): 13.33, 17.75, 34.79, 54.87, 60.14, 106.91, 117.51, 126.71, 127.77, 129.21, 134.35, 140.50, 146.10, 157.10, 163.67, 169.72.

- - 1. **.1H NMR, 13C NMR Spectrometry of compounds**

**
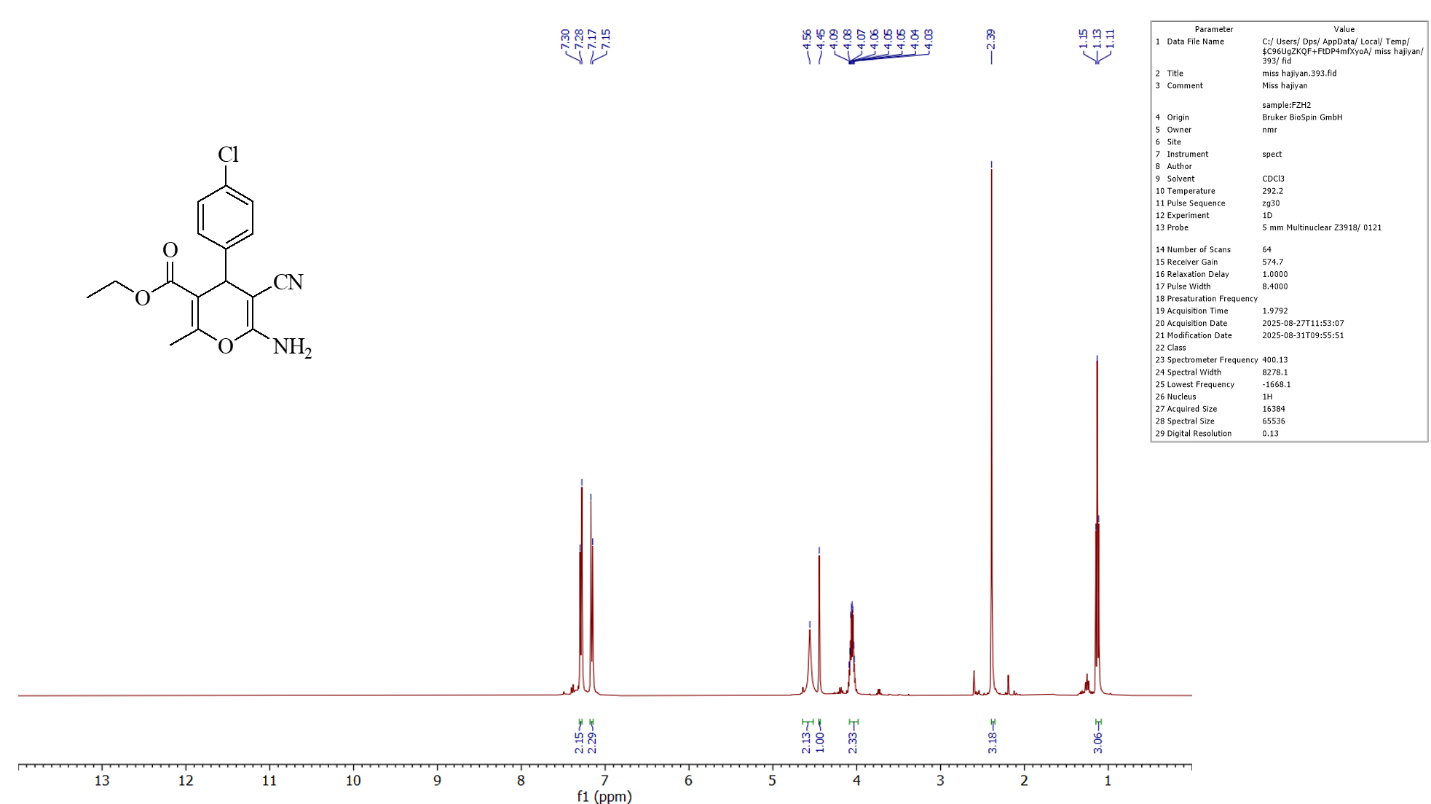
**

Figure S1. 1H NMR spectrum of compound **5a**.


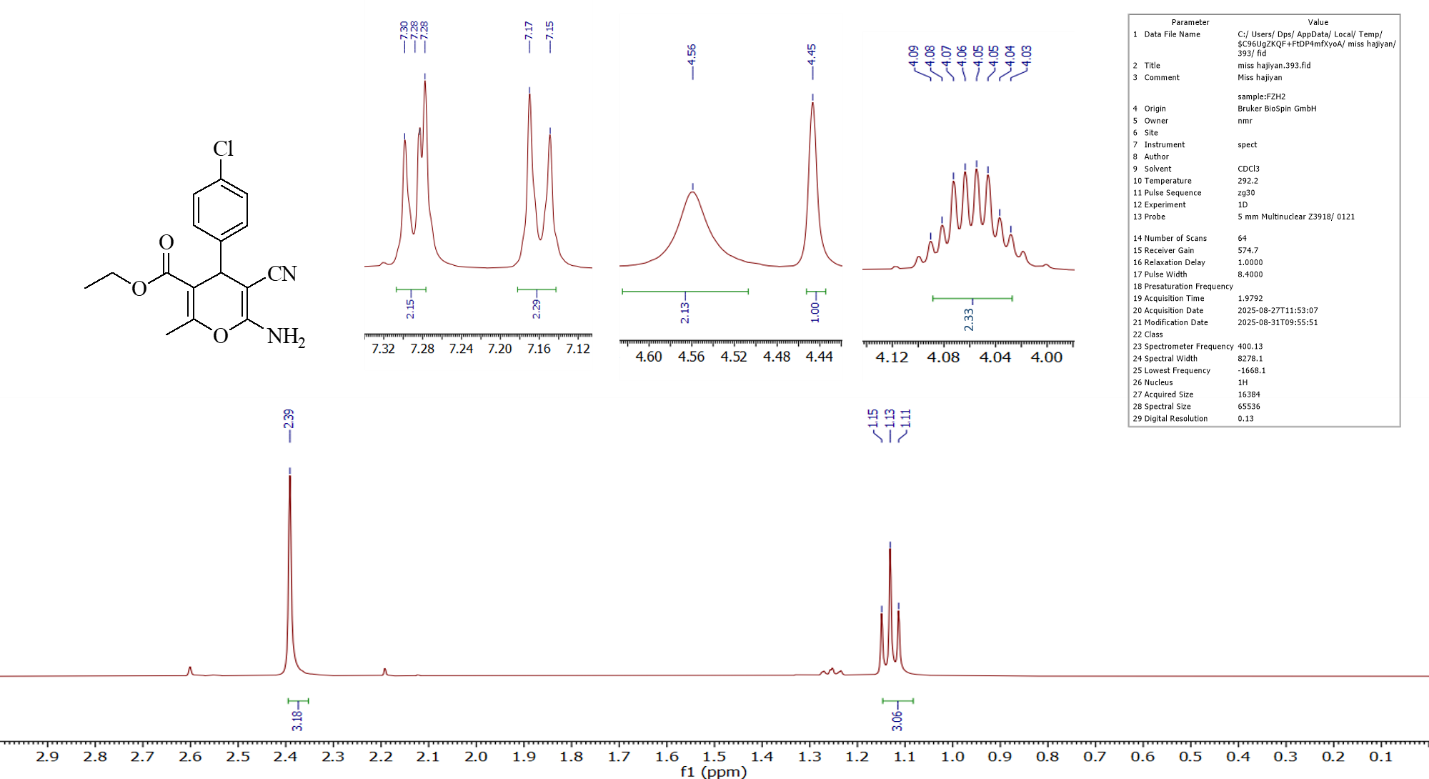


Figure S2. Expanded 1H NMR spectrum of compound **5a**.


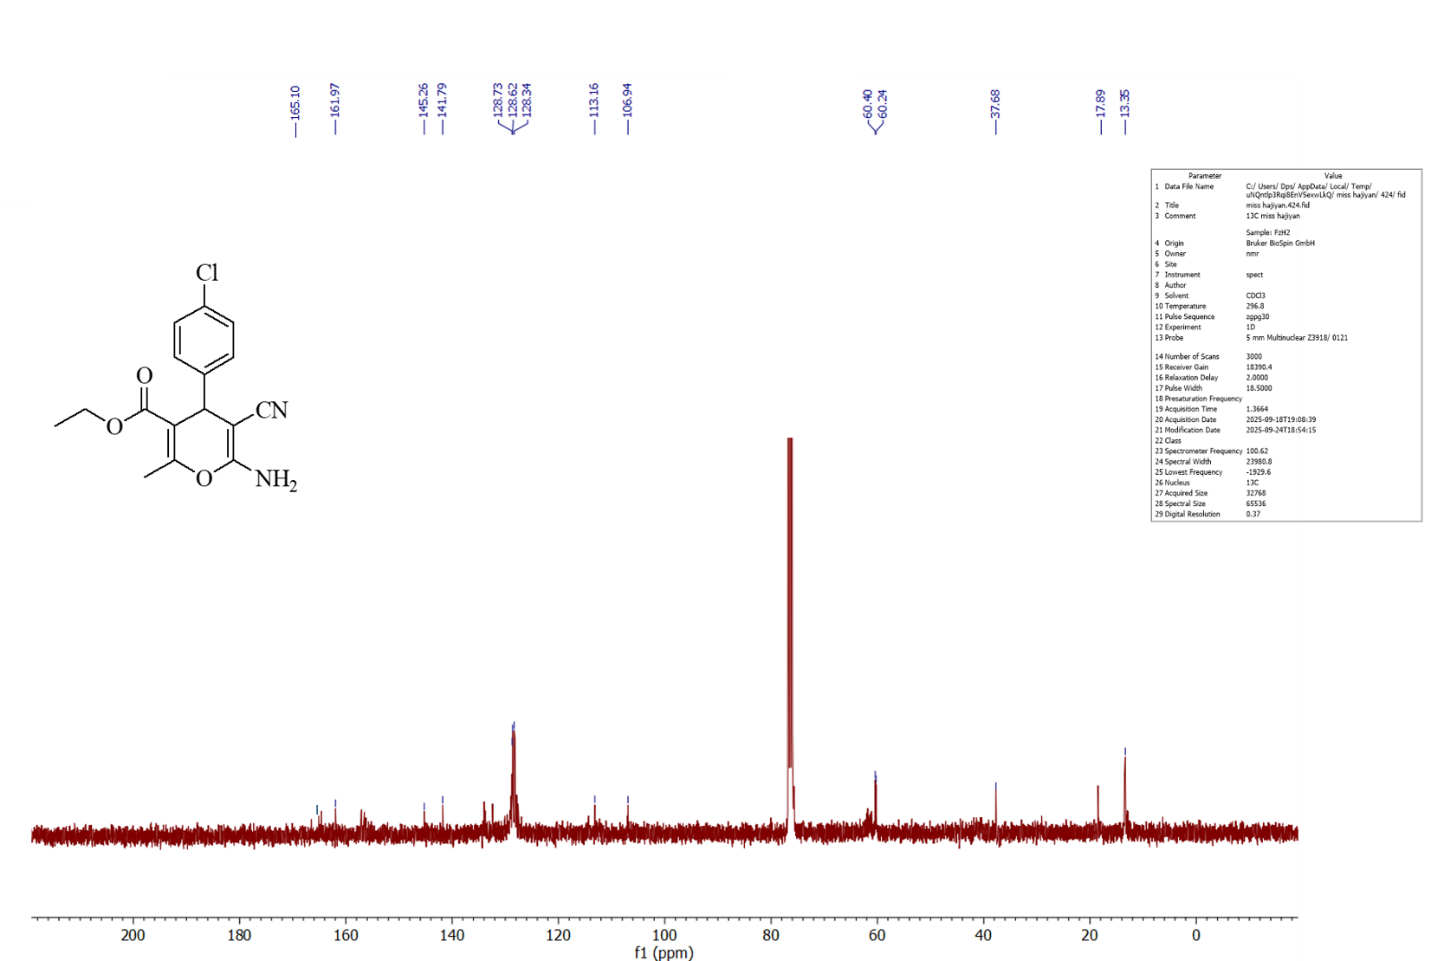


Figure S3. 13C NMR spectrum of compound **5a**.

**
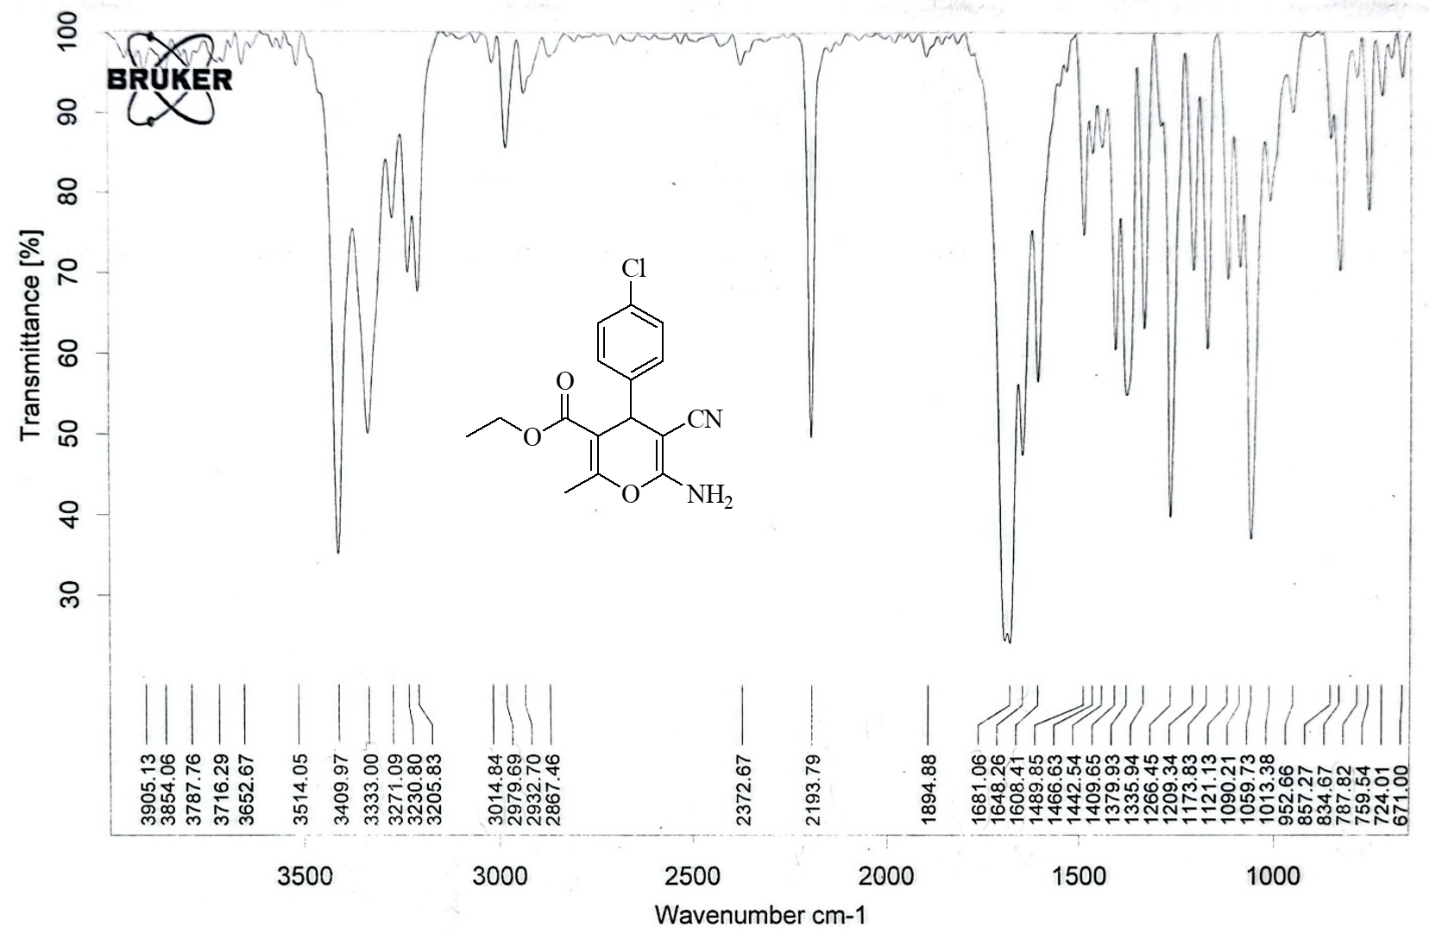
**

Figure S4. FTIR spectrum of compound **5a.**


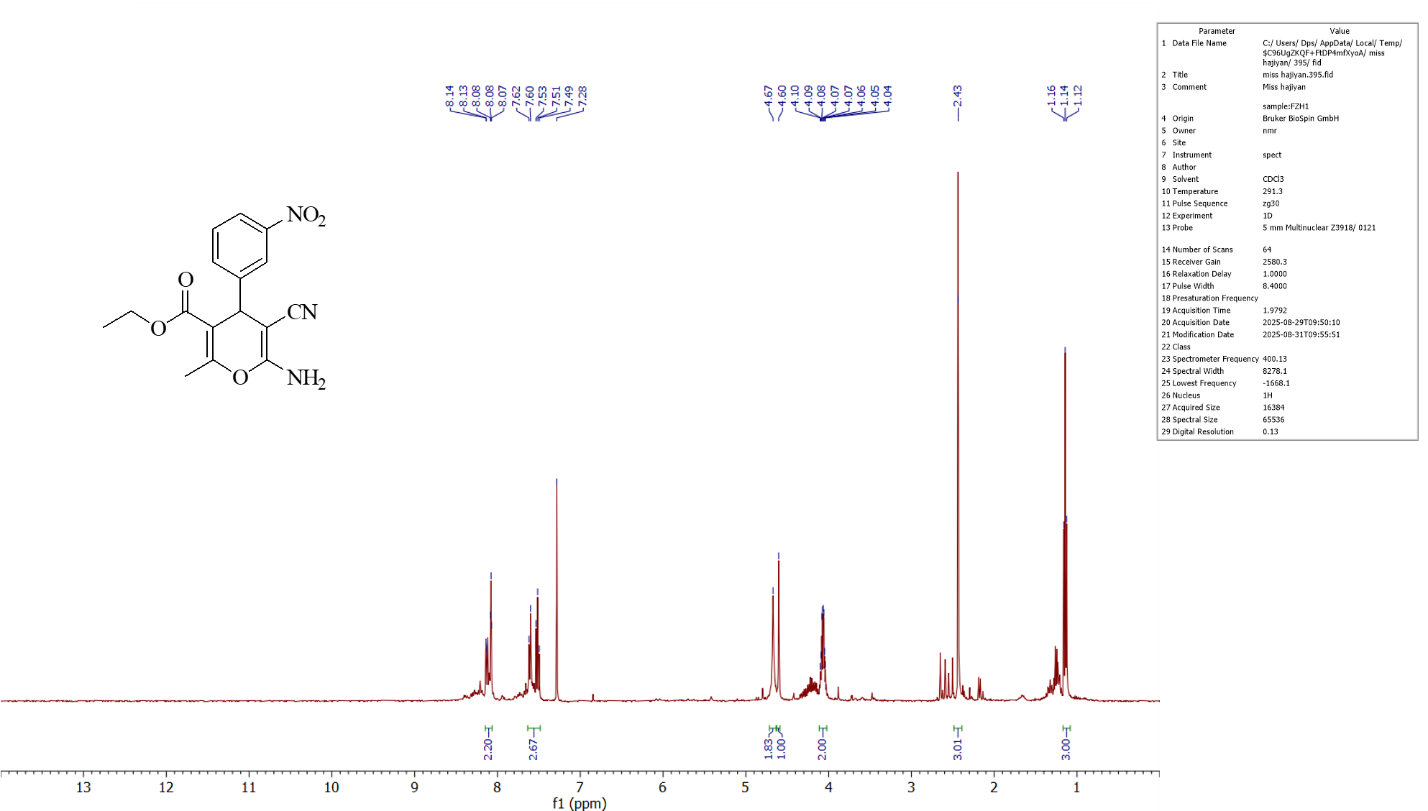


Figure S5. 1H NMR spectrum of compound **5b**.


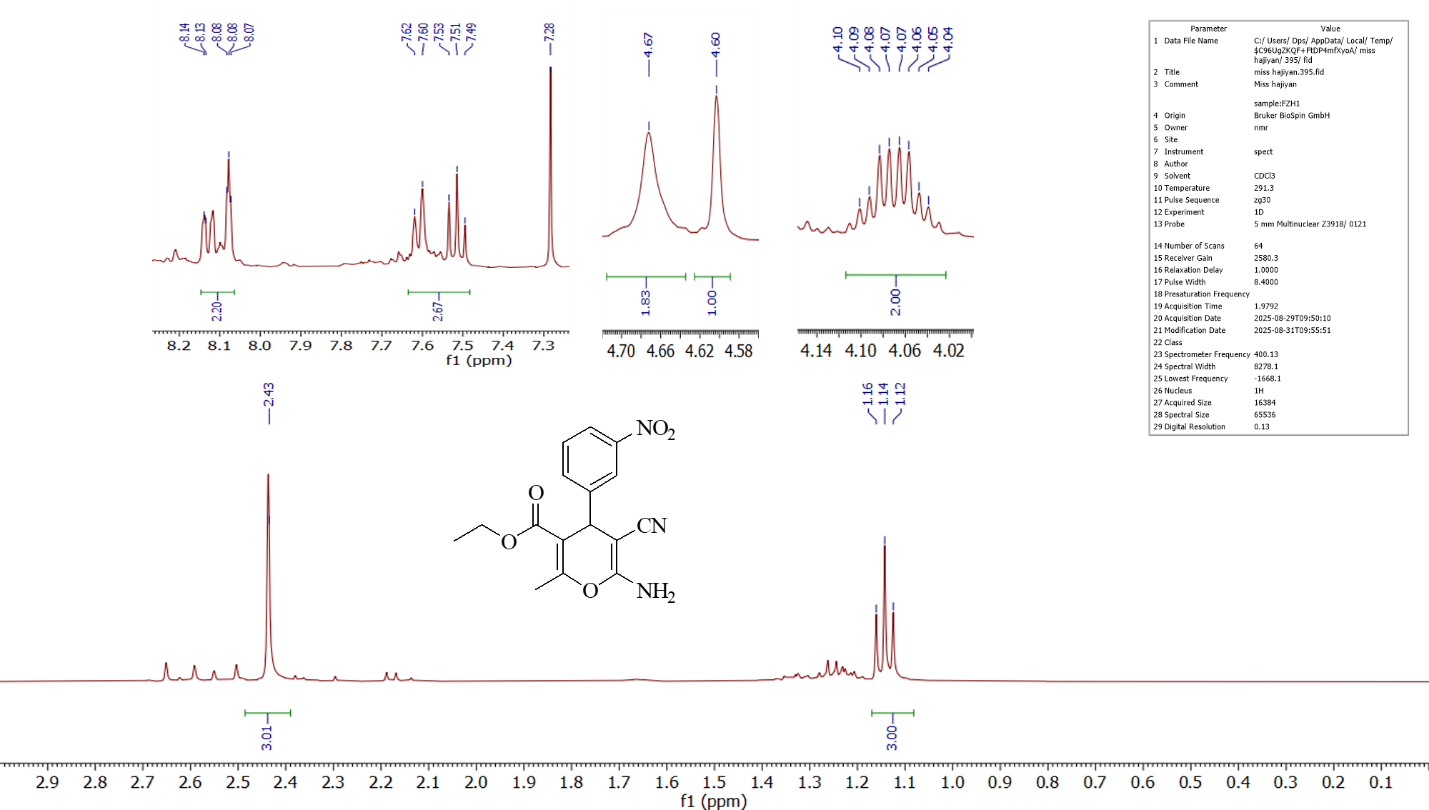


Figure S6. Expanded 1H NMR spectrum of compound **5b**.


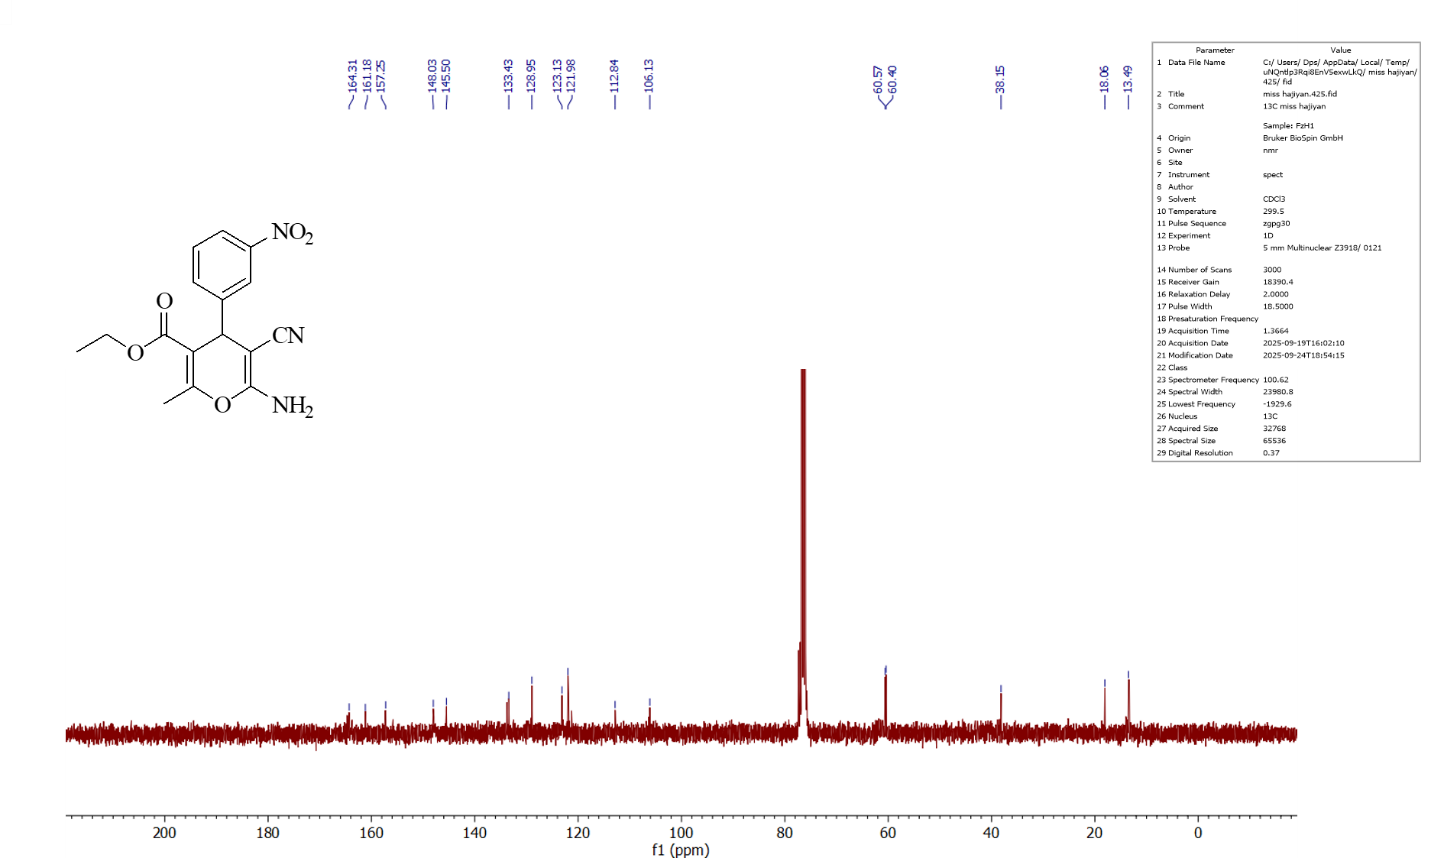


Figure S7. 13C NMR spectrum of compound **5b**.


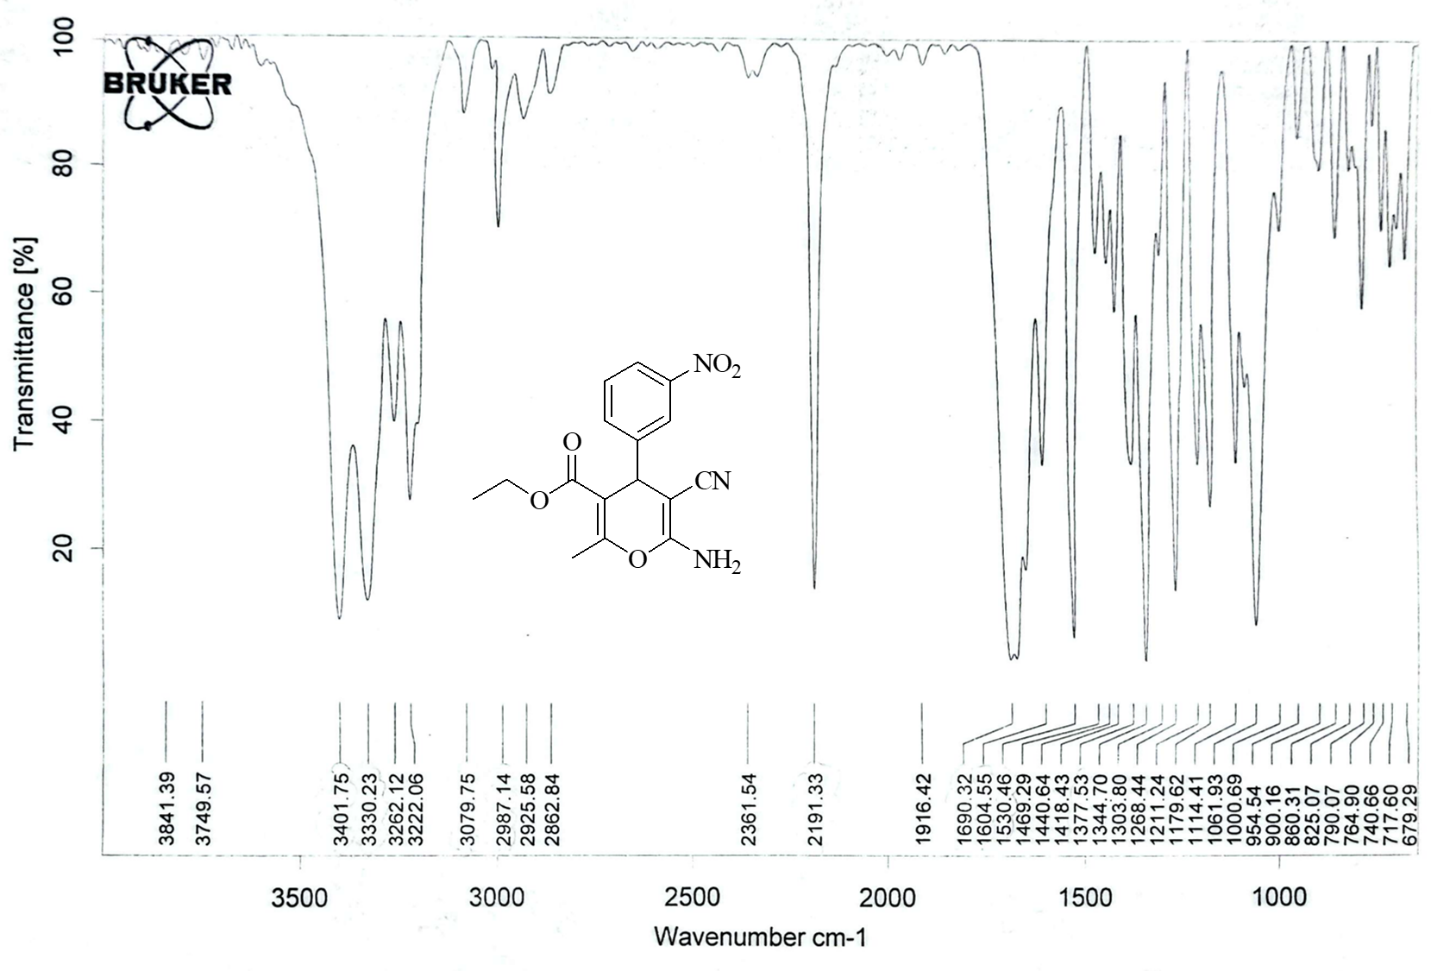


Figure S8. FTIR spectrum of compound **5b.**

**
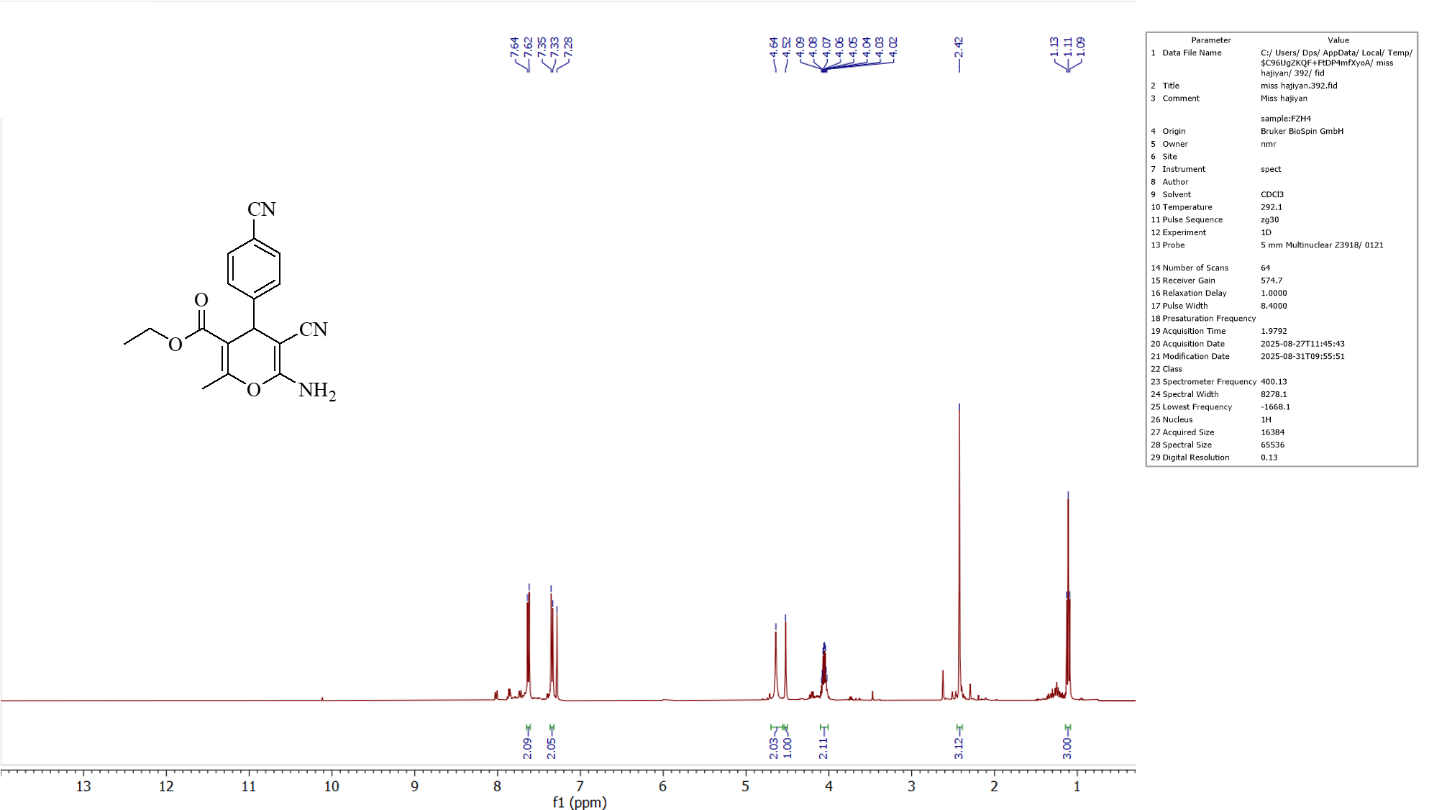
** Figure S9. 1H NMR spectrum of compound **5d**.


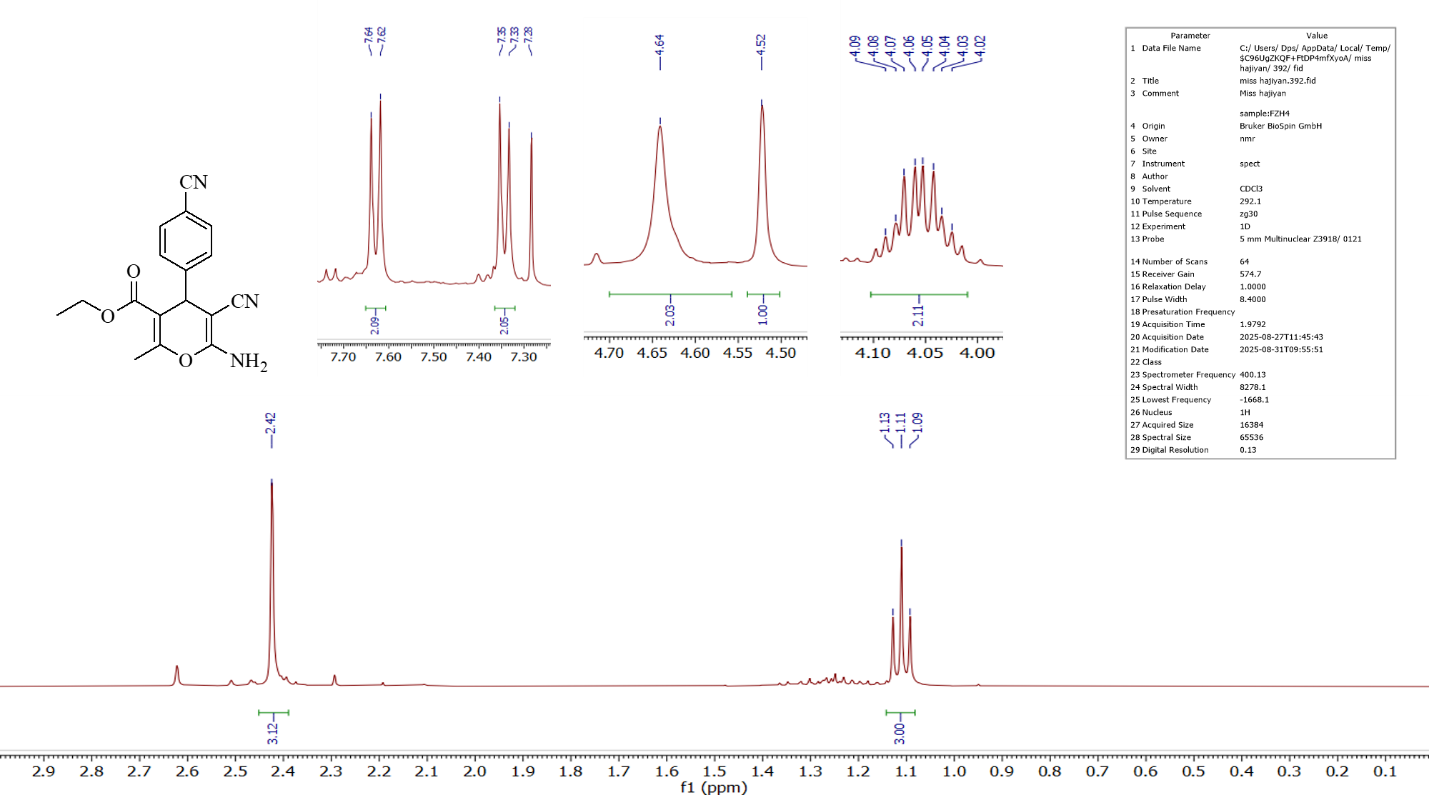


Figure S10. Expanded 1H NMR spectrum of compound **5d**.


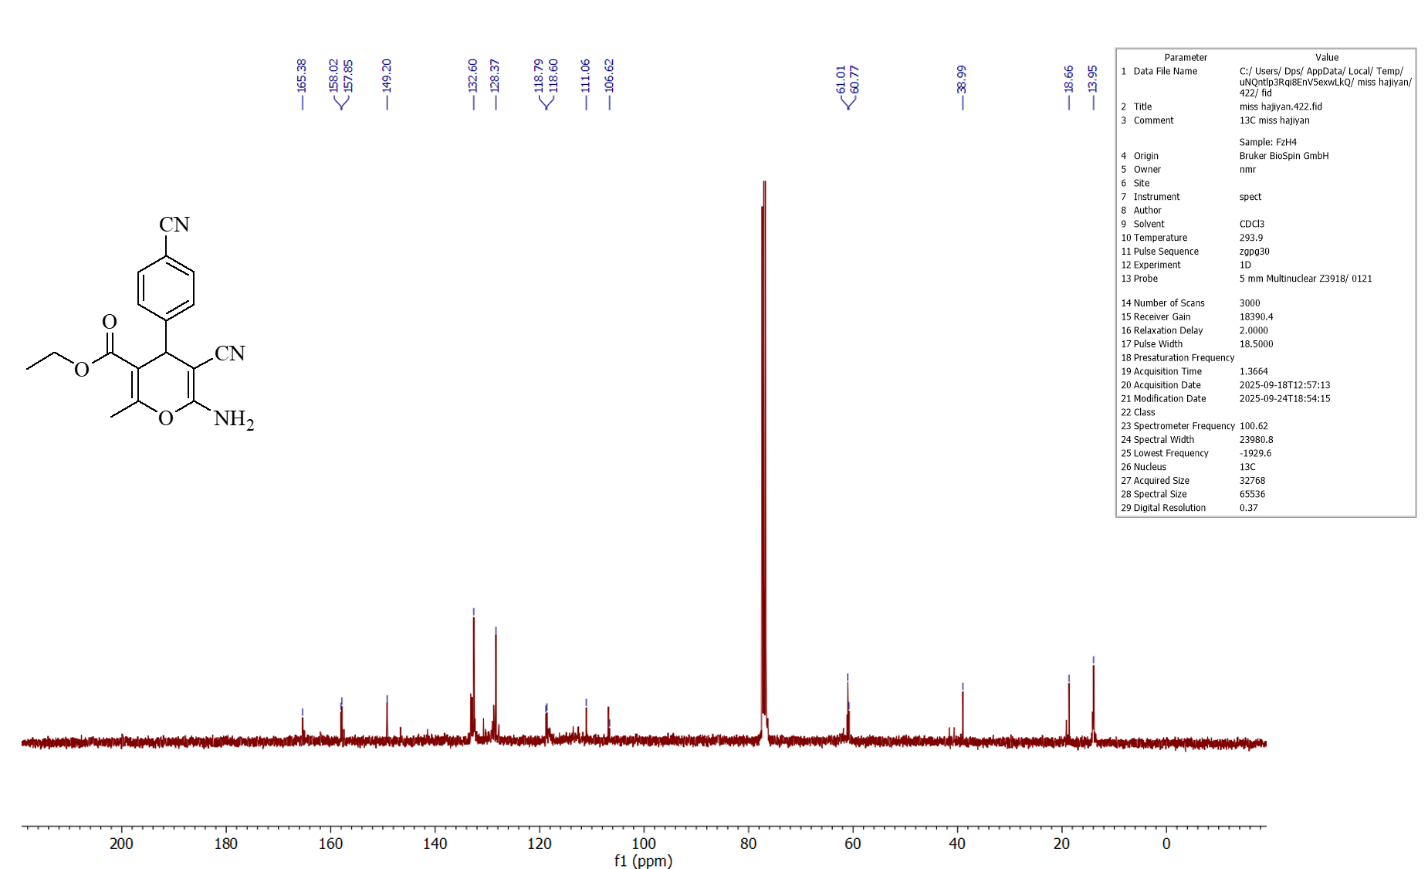


Figure S11. 13C NMR spectrum of compound **5d**.

**
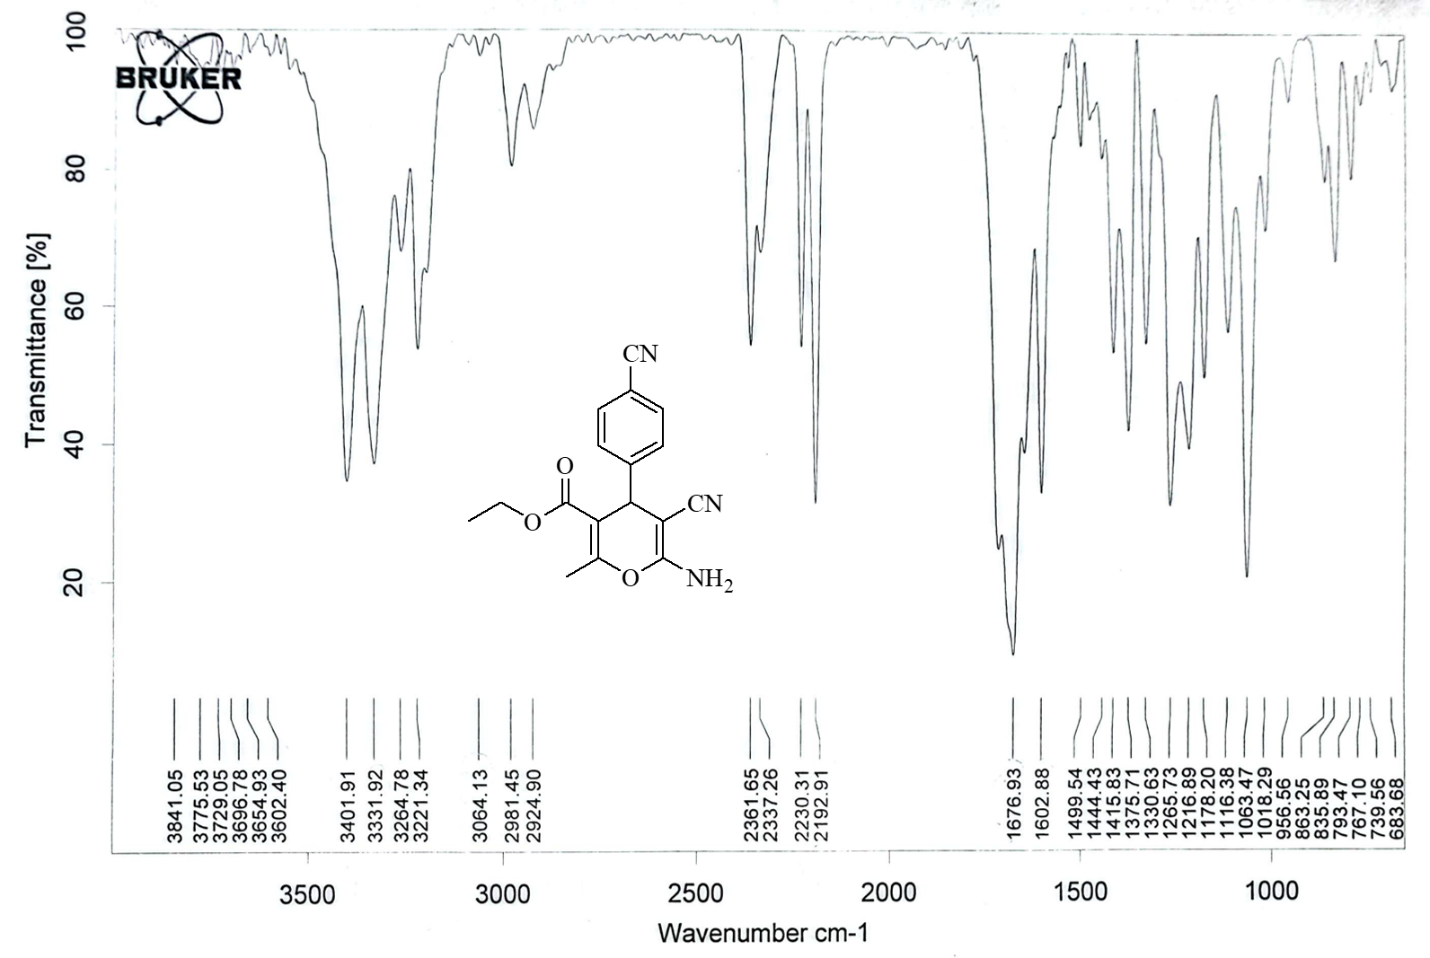
** Figure S12. FTIR spectrum of compound **5d.**


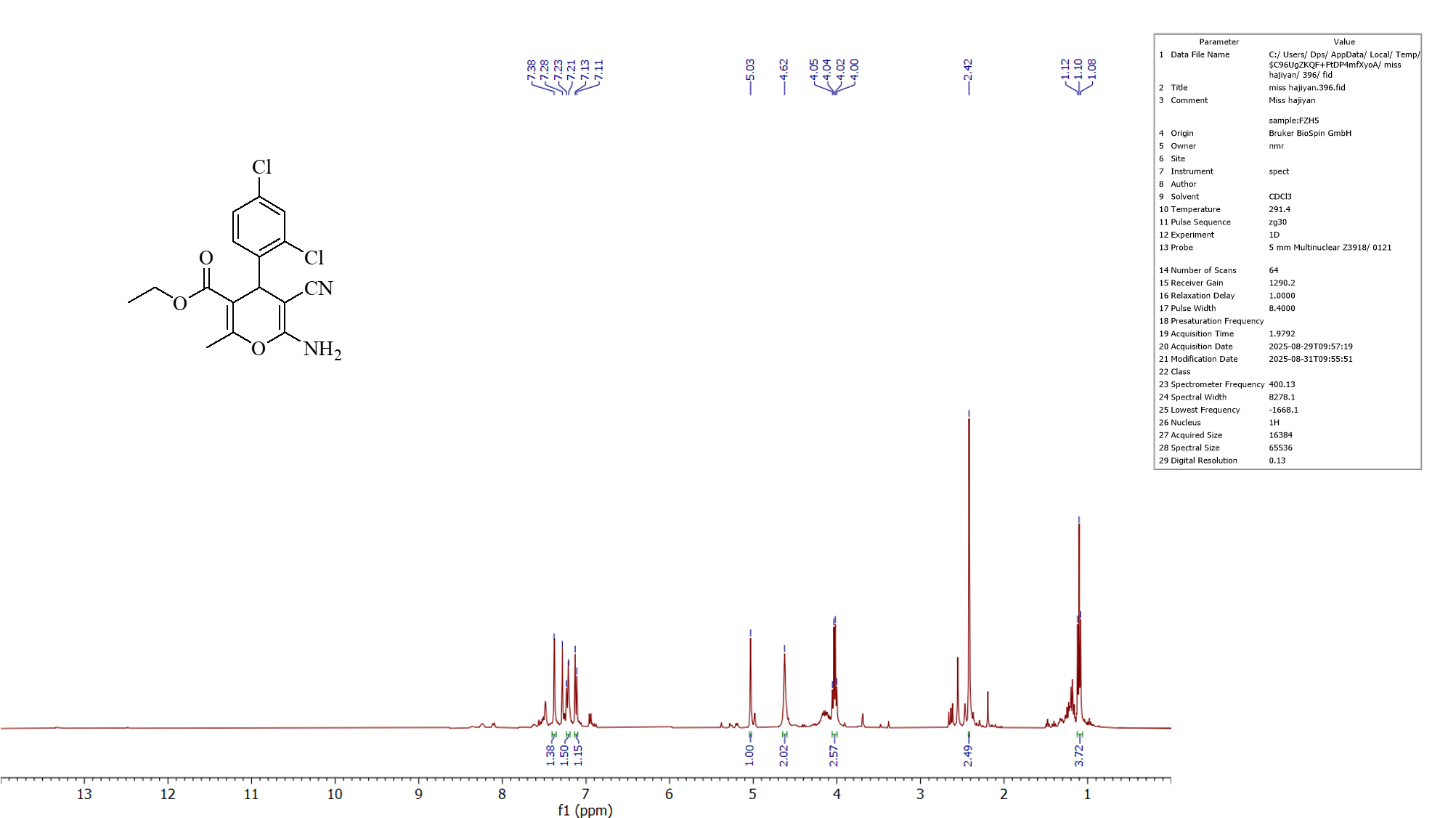


Figure S13. 1H NMR spectrum of compound **5e**.


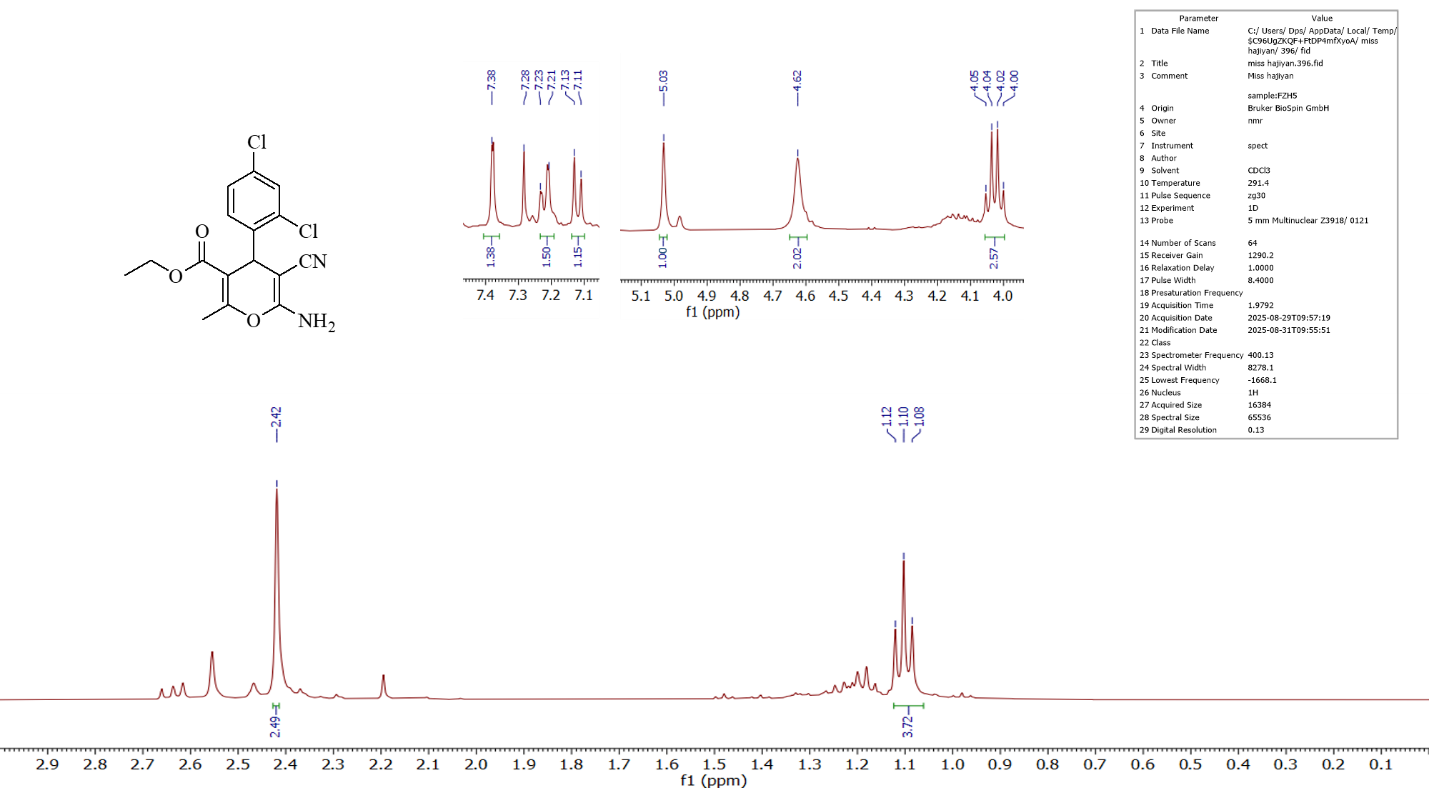


Figure S14. Expanded 1H NMR spectrum of compound **5e**.


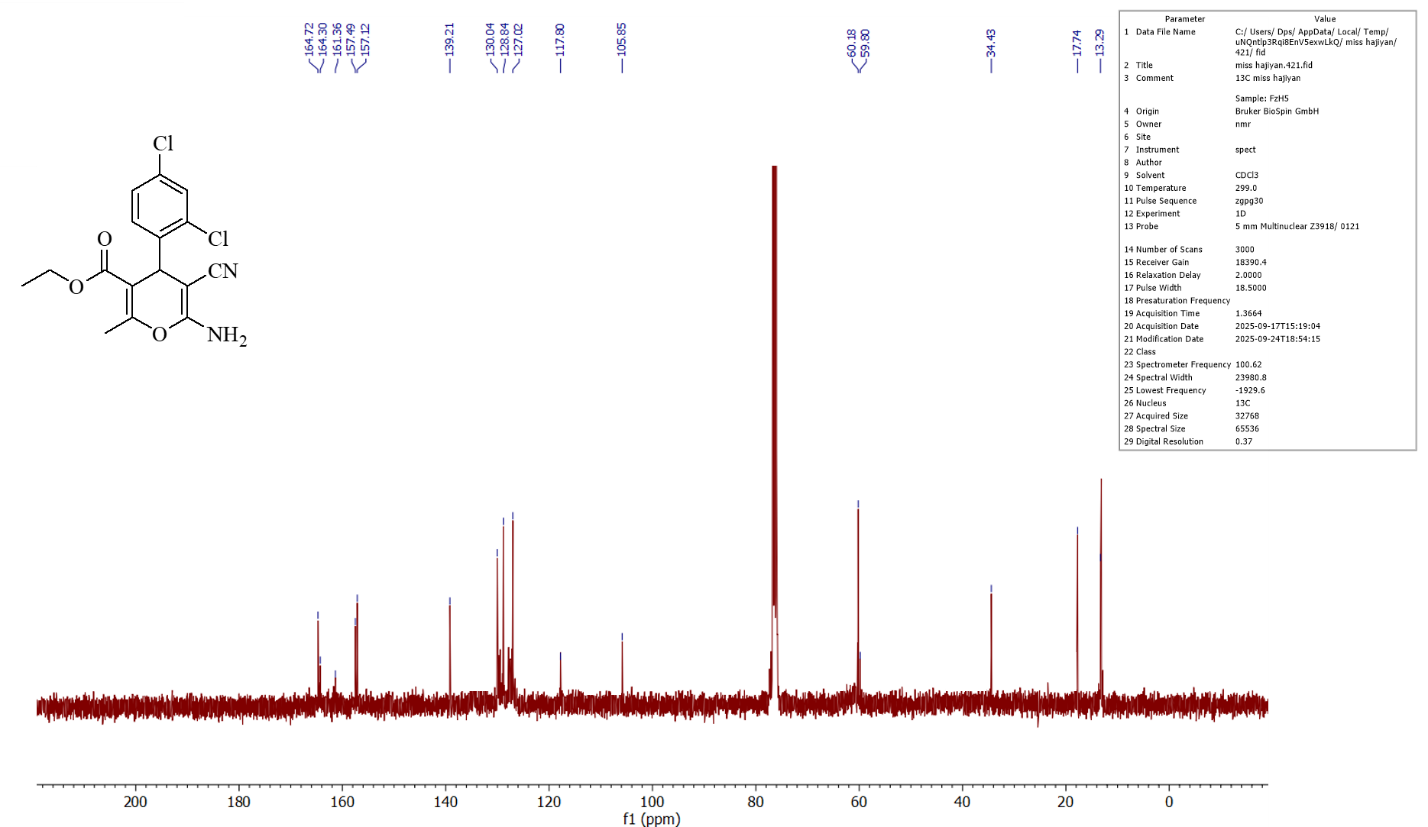


Figure S15. 13C NMR spectrum of compound **5e**.


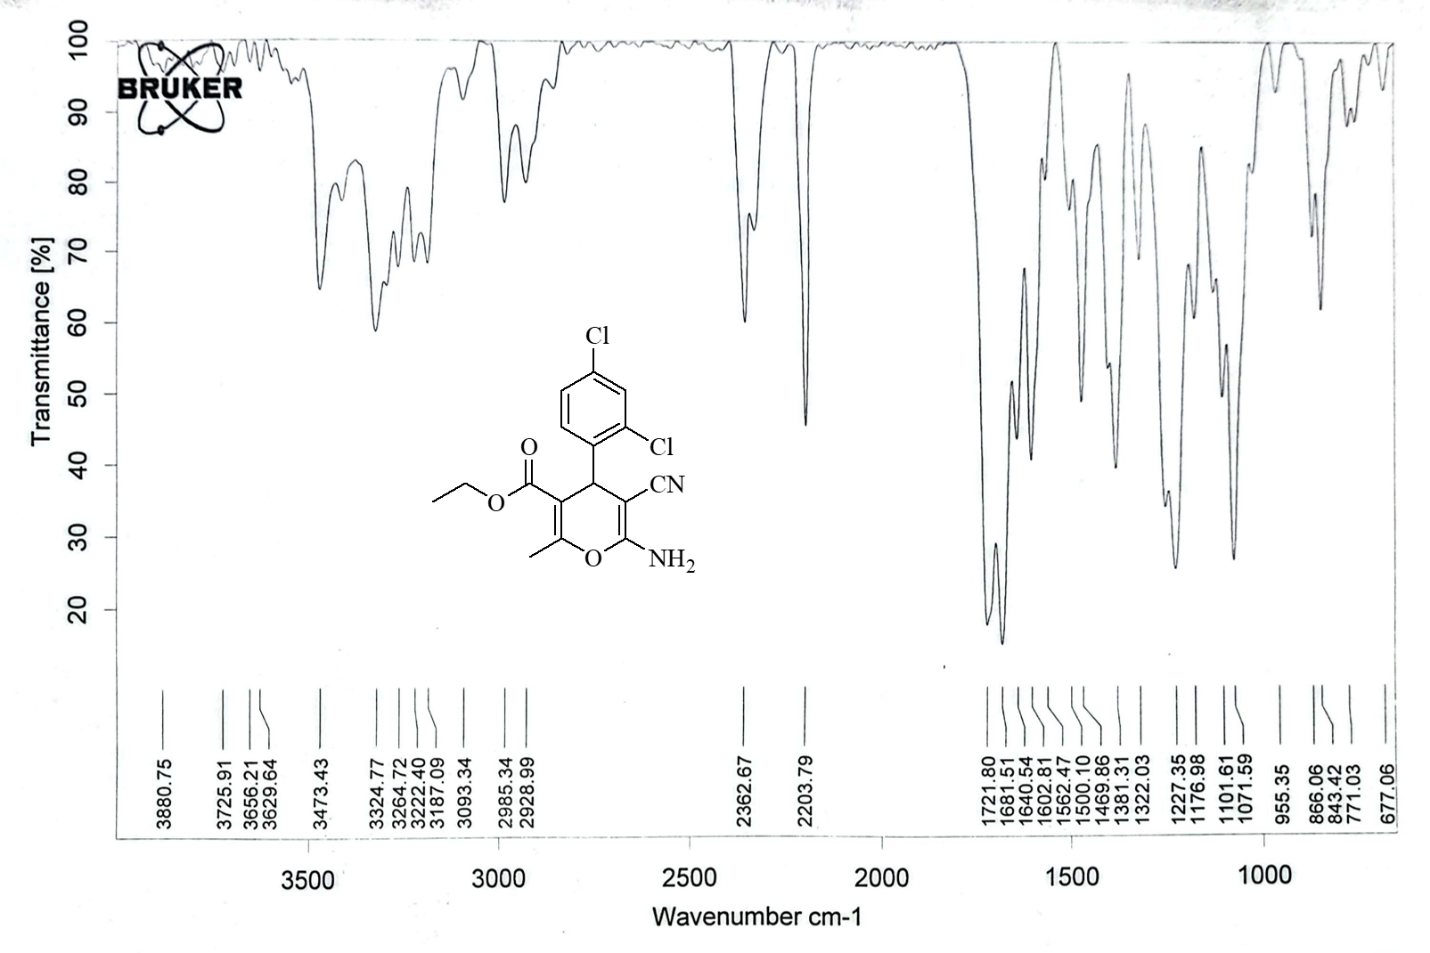


Figure S16. FTIR spectrum of compound **5e.**


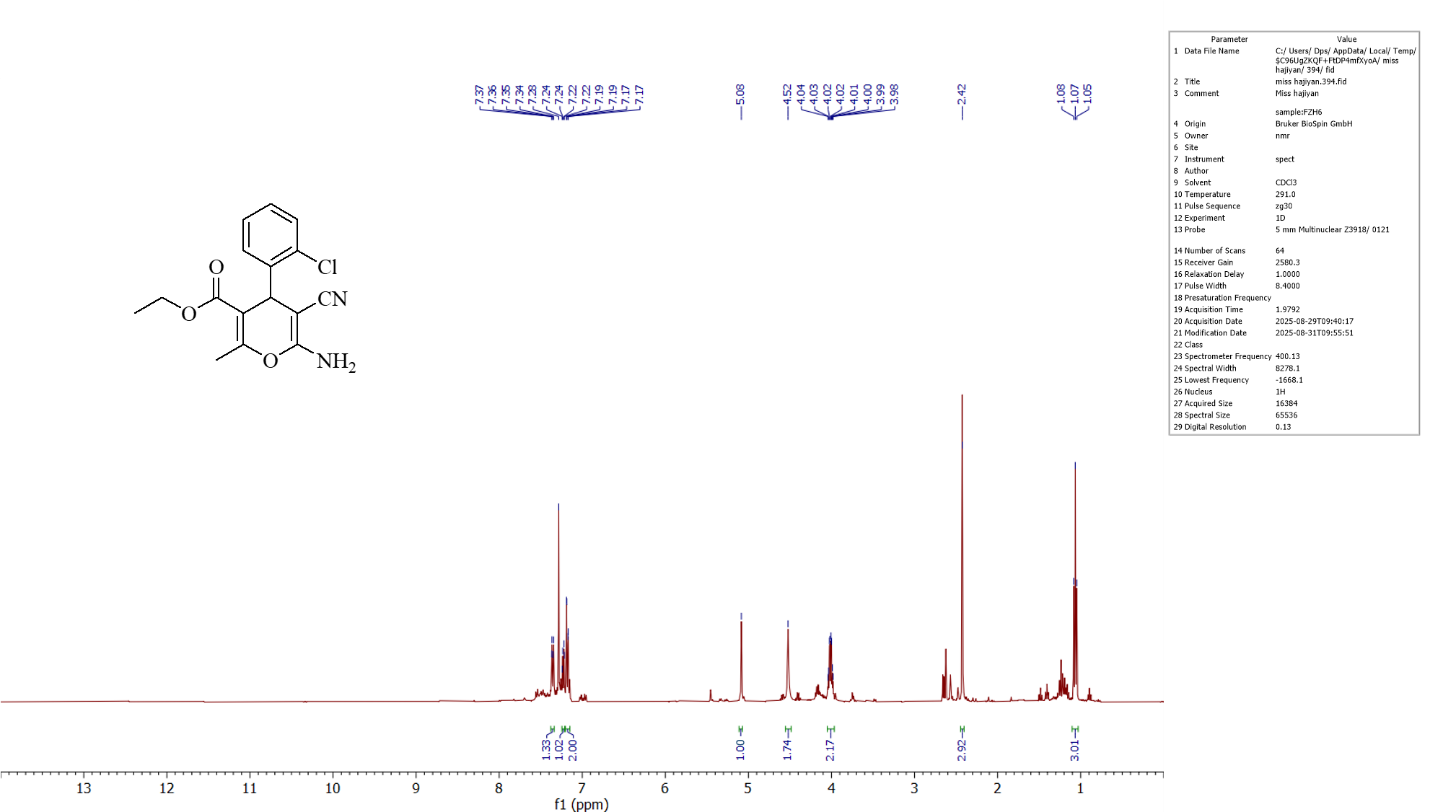


Figure S17. 1H NMR spectrum of compound **5f**.


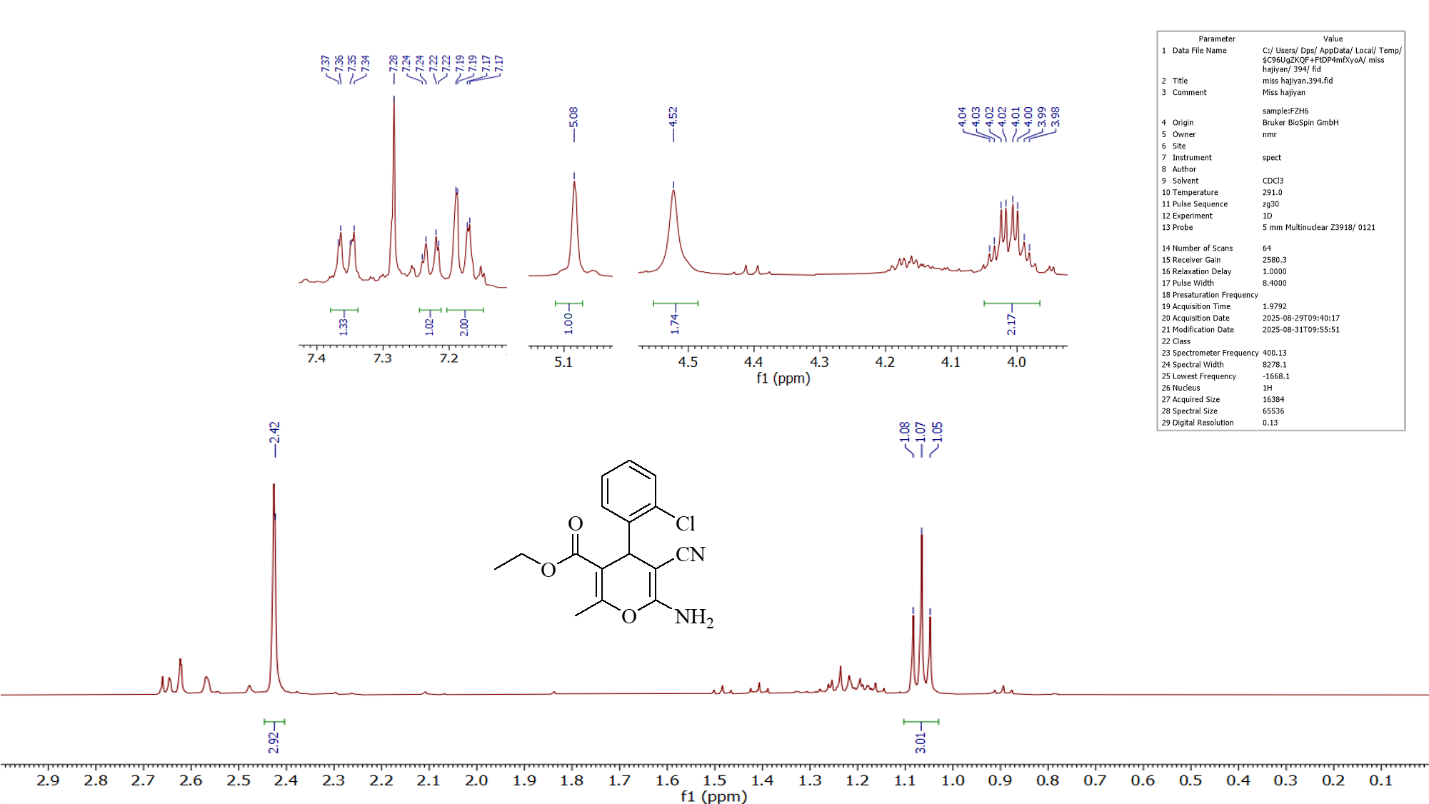


Figure S18. Expanded 1H NMR spectrum of compound **5f**.


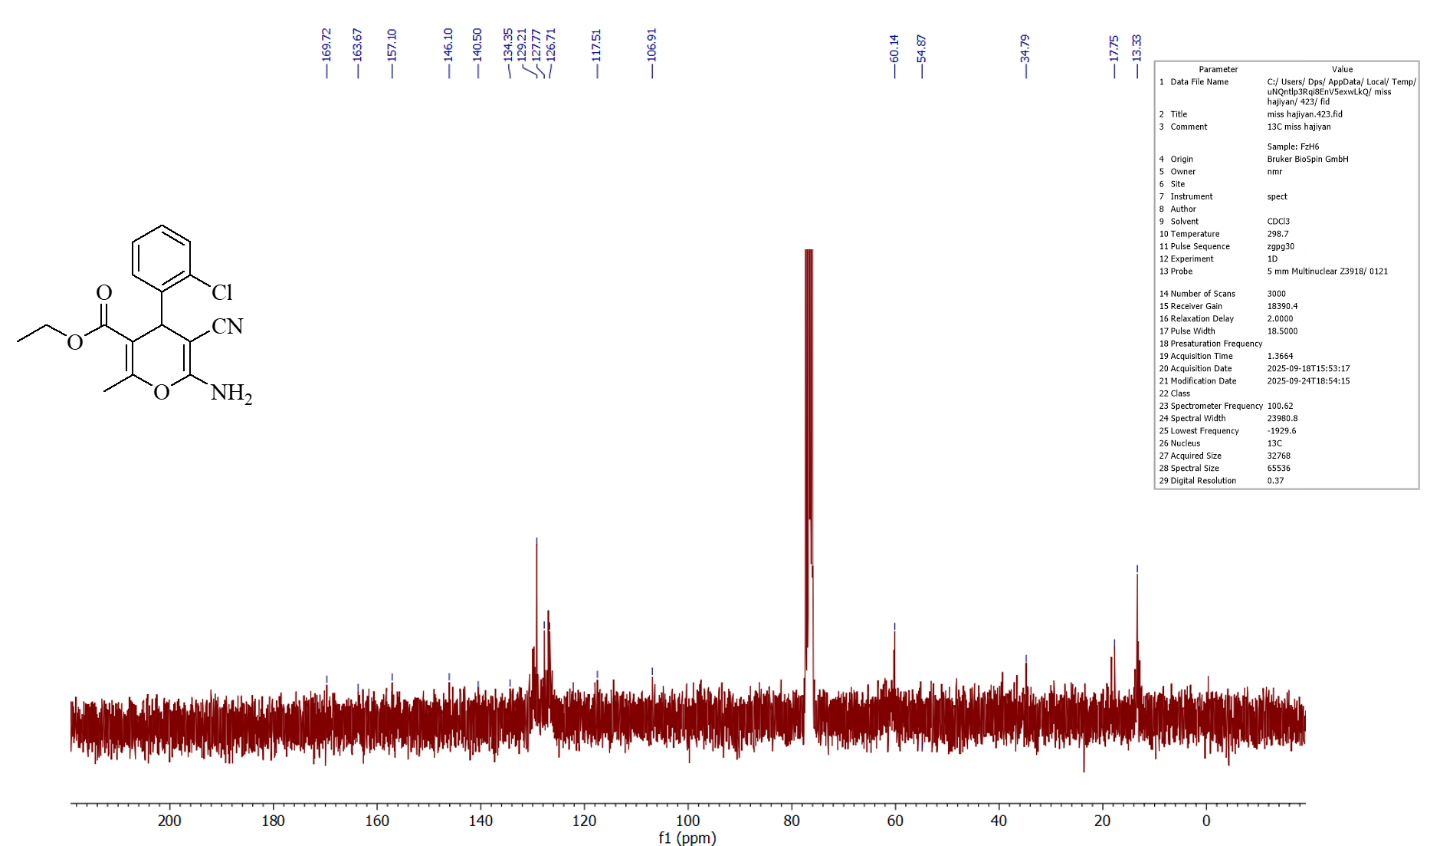


Figure S19. 13C NMR spectrum of compound **5f**.


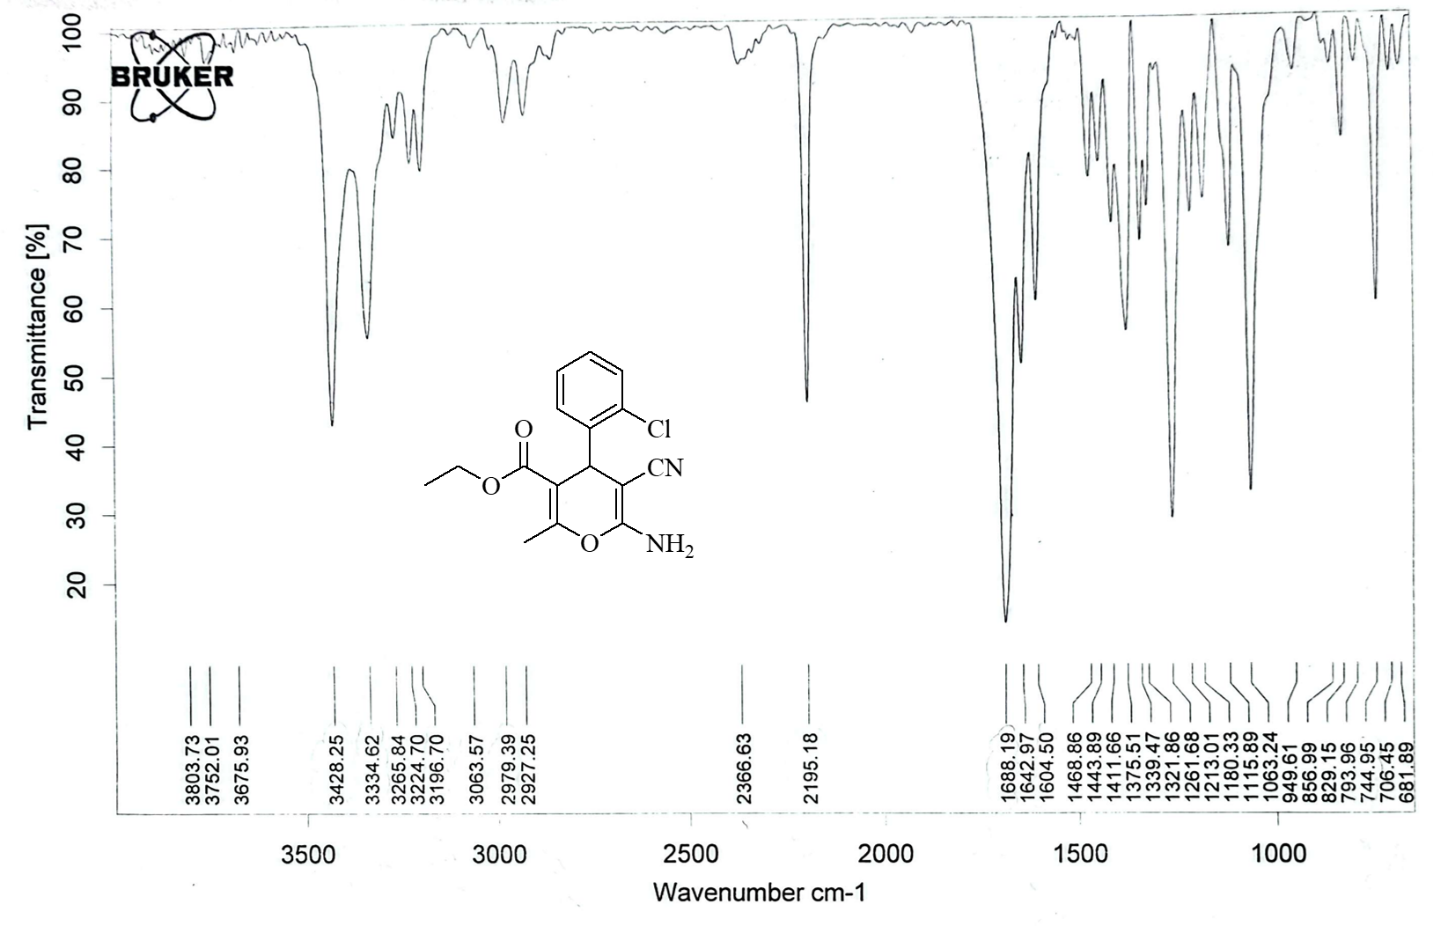


Figure S20. FTIR spectrum of compound **5f.**
